# Supplementary material
Source: HighWire-hosted journal article supplement (http://cmaj.ca/highwire/filestream/148382/field_highwire_adjunct_files/0/221404-res-1-at.pdf)
Supplement: 221404-res-1-at.pdf [file 221404-res-1-at.pdf]

## Supplemental material

|                                                                                                                                                                                                                                                                                                    |    |
|----------------------------------------------------------------------------------------------------------------------------------------------------------------------------------------------------------------------------------------------------------------------------------------------------|----|
| Supplemental Methods and Results .....                                                                                                                                                                                                                                                             | 2  |
| Adjustment for two-step methods (before and after October 2010) – Sensitivity analysis .....                                                                                                                                                                                                       | 2  |
| Missing pre-pregnancy body mass index: Imputation of missing data – Sensitivity analysis.....                                                                                                                                                                                                      | 2  |
| Supplemental Table 1. Risk estimates with additional population characteristics and risk factors .....                                                                                                                                                                                             | 3  |
| Supplemental Table 2. Population characteristics by gestational diabetes diagnosis in British Columbia, Canada (2005-2019) .....                                                                                                                                                                   | 4  |
| Supplemental Figure 1. Gestational diabetes risk models stratified by health region .....                                                                                                                                                                                                          | 6  |
| Supplemental Figure 2. Gestational diabetes risk models stratified by pre-pregnancy body mass index.....                                                                                                                                                                                           | 7  |
| Supplemental Figure 3. Gestational diabetes risk models stratified by age of birthing person at delivery.....                                                                                                                                                                                      | 8  |
| Supplemental Figure 4. Gestational diabetes risk modeled with addition of prior history of gestational diabetes (sensitivity analysis) .....                                                                                                                                                       | 9  |
| Supplemental Figure 5. Gestational diabetes risk modeled with a variable to adjust for the change in two-step screening from using a 3-hour-100g test with Carpenter-Coustan criteria (prior to October 2010) to using the 2-hour-75g test for two-step screening (Diabetes Canada criteria) ..... | 10 |

## Supplemental Methods and Results

### Adjustment for two-step methods (before and after October 2010) – Sensitivity analysis

#### *Methods*

In British Columbia, prior to October 2010 (1), the “two-step” method of screening included a 1-hour-50g glucose challenge screening test, followed by a 3-hour-100g oral glucose tolerance test diagnostic test using Carpenter-Coustan criteria. After October 2010, the “two-step” method continued to use a 1-hour-50g but the diagnostic test used a 2-hour-75g test with the Diabetes Canada 2013 criteria (2). These two screening approaches are similar, but will result in a slightly different diagnostic threshold. In the primary analysis, all two-step screening was analyzed as the same screening approach. In sensitivity analysis, we used an additional variable to control for the differences between the two-step methods (before and after October 2010).

#### *Results*

Overall results were unchanged and the additional variable was not statistically significant in models, thus we considered all two-step screening as the same approach for the main analysis (Supplemental Figure 4).

### Missing pre-pregnancy body mass index: Imputation of missing data – Sensitivity analysis

#### *Methods*

Approximately 30 % of the study population had missing data for pre-pregnancy body mass index (BMI) (Table 1). Our primary analysis categorized pre-pregnancy BMI and included missing data as a separate category for the regression models. To assess the effect of missingness in our models we also imputed missing BMI data for the study population using a multiple imputation with chained equations (3) for 20 data sets (4). We considered all available covariates and the primary outcome (with an absolute correlation with the response/ imputed variable > 0.05) as predictors for imputation. We repeated our sequential regression models among imputed data sets to obtain pooled effect estimates.

#### *Results*

Using pooled effect estimates with imputed data for pre-pregnancy BMI, model estimates comparing 2019 to 2005 were essentially unchanged from the primary analysis. Only model (4) incorporated BMI data; all other models were unaffected by missing data. Results from model (4) (adjustment for trends in population characteristics with imputed pre-pregnancy BMI data) comparing 2019 to 2005 found a 1.23-fold increase, 95% CI 1.15 to 1.32 in gestational diabetes risk. This is highly comparable to the primary analytic models (1.25-fold increase, 95% CI 1.2 to 1.3 (Table 1)).

The effect of changing screening practices and demographics on the incidence of gestational diabetes in British Columbia, Canada from 2005-2019

Supplemental Table 1. Risk estimates with additional population characteristics and risk factors

| Year | Final model results<br>(Model 4 from Table 1) |              | Add rural |              | Add neighbourhood<br>income per person<br>quintiles |              | Add prior<br>macrosomia |              | Add ≥2 prior<br>cesarean<br>deliveries |              |
|------|-----------------------------------------------|--------------|-----------|--------------|-----------------------------------------------------|--------------|-------------------------|--------------|----------------------------------------|--------------|
|      | RR                                            | CI           | RR        | CI           | RR                                                  | CI           | RR                      | CI           | RR                                     | CI           |
| 2005 | Baseline                                      |              | Baseline  |              | Baseline                                            |              | Baseline                |              |                                        |              |
| 2006 | 0.96                                          | 0.91 to 1.01 | 0.96      | 0.91 to 1.01 | 0.96                                                | 0.91 to 1.01 | 0.96                    | 0.91 to 1.01 | 0.96                                   | 0.91 to 1.01 |
| 2007 | 1.04                                          | 0.99 to 1.09 | 1.04      | 0.98 to 1.09 | 1.04                                                | 0.98 to 1.09 | 1.04                    | 0.98 to 1.09 | 1.04                                   | 0.98 to 1.09 |
| 2008 | 1.04                                          | 0.99 to 1.09 | 1.04      | 0.99 to 1.09 | 1.04                                                | 0.98 to 1.09 | 1.04                    | 0.99 to 1.09 | 1.04                                   | 0.99 to 1.09 |
| 2009 | 1.09                                          | 1.03 to 1.14 | 1.09      | 1.03 to 1.14 | 1.08                                                | 1.03 to 1.14 | 1.09                    | 1.03 to 1.14 | 1.09                                   | 1.03 to 1.14 |
| 2010 | 1.02                                          | 0.97 to 1.07 | 1.02      | 0.97 to 1.07 | 1.02                                                | 0.97 to 1.07 | 1.02                    | 0.97 to 1.07 | 1.02                                   | 0.97 to 1.07 |
| 2011 | 1.02                                          | 0.97 to 1.07 | 1.02      | 0.97 to 1.07 | 1.02                                                | 0.97 to 1.07 | 1.02                    | 0.97 to 1.07 | 1.02                                   | 0.97 to 1.07 |
| 2012 | 0.98                                          | 0.93 to 1.03 | 0.98      | 0.93 to 1.03 | 0.97                                                | 0.93 to 1.02 | 0.98                    | 0.94 to 1.03 | 0.98                                   | 0.93 to 1.03 |
| 2013 | 1.04                                          | 0.99 to 1.09 | 1.04      | 0.99 to 1.10 | 1.04                                                | 0.99 to 1.09 | 1.05                    | 1.00 to 1.10 | 1.04                                   | 0.99 to 1.09 |
| 2014 | 1.01                                          | 0.96 to 1.06 | 1.01      | 0.97 to 1.06 | 1.01                                                | 0.96 to 1.06 | 1.02                    | 0.97 to 1.07 | 1.01                                   | 0.96 to 1.06 |
| 2015 | 1.13                                          | 1.07 to 1.18 | 1.13      | 1.08 to 1.18 | 1.13                                                | 1.08 to 1.18 | 1.13                    | 1.08 to 1.19 | 1.13                                   | 1.07 to 1.18 |
| 2016 | 1.16                                          | 1.11 to 1.22 | 1.16      | 1.11 to 1.22 | 1.16                                                | 1.11 to 1.22 | 1.17                    | 1.12 to 1.22 | 1.16                                   | 1.11 to 1.22 |
| 2017 | 1.19                                          | 1.13 to 1.24 | 1.19      | 1.14 to 1.25 | 1.19                                                | 1.13 to 1.24 | 1.20                    | 1.14 to 1.25 | 1.19                                   | 1.13 to 1.24 |
| 2018 | 1.17                                          | 1.11 to 1.22 | 1.17      | 1.12 to 1.22 | 1.17                                                | 1.11 to 1.22 | 1.17                    | 1.12 to 1.23 | 1.16                                   | 1.11 to 1.22 |
| 2019 | 1.25                                          | 1.19 to 1.31 | 1.25      | 1.20 to 1.31 | 1.25                                                | 1.20 to 1.31 | 1.26                    | 1.20 to 1.32 | 1.25                                   | 1.19 to 1.31 |

The effect of changing screening practices and demographics on the incidence of gestational diabetes in British Columbia, Canada from 2005-2019

Supplemental Table 2. Population characteristics by gestational diabetes diagnosis in British Columbia, Canada (2005-2019)

| Characteristic                                           | Overall<br>N = 551,457 | No gestational<br>diabetes diagnosed<br>N = 495,175 | Gestational<br>diabetes<br>diagnosed<br>N = 56, 282 |
|----------------------------------------------------------|------------------------|-----------------------------------------------------|-----------------------------------------------------|
| Nulliparous                                              | 254,588 (46%)          | 230,370 (47%)                                       | 24,218 (43%)                                        |
| Pre-pregnancy body mass index (kg/m <sup>2</sup> )       |                        |                                                     |                                                     |
| <24.9                                                    | 265,155 (48%)          | 244,370 (49%)                                       | 20,785 (37%)                                        |
| 25.0-29.9                                                | 87,533 (16%)           | 76,192 (15%)                                        | 11,341 (20%)                                        |
| 30.0-34.9                                                | 34,047 (6%)            | 28,060 (6%)                                         | 5,987 (11%)                                         |
| >35.0                                                    | 20,765 (4%)            | 15,970 (3%)                                         | 4,795 (9%)                                          |
| Missing data                                             | 143,957 (26%)          | 130,583 (26%)                                       | 13,374 (24%)                                        |
| Age of birthing person/mother (years)                    |                        |                                                     |                                                     |
| less than 25                                             | 73,118 (13%)           | 70,291 (14%)                                        | 2,827 (5%)                                          |
| 25-34                                                    | 342,918 (62%)          | 310,705 (63%)                                       | 32,213 (57%)                                        |
| 35+                                                      | 135,421 (25%)          | 114,179 (23%)                                       | 21,242 (38%)                                        |
| Multifetal pregnancy (v singleton)                       | 8,488 (2%)             | 7,247 (1%)                                          | 1,241 (2%)                                          |
| Medical/obstetric complications (composite) <sup>b</sup> | 39,945 (7%)            | 34,053 (7%)                                         | 5,892 (10%)                                         |
| Mother's region of birth (infant birth certificate)      |                        |                                                     |                                                     |
| All other regions                                        | 373,582 (68%)          | 346,355 (70%)                                       | 27,227 (49%)                                        |
| Asia                                                     | 127,945 (23%)          | 103,821 (21%)                                       | 24,124 (43%)                                        |
| Canada or USA (or missing (<0.5%))                       | 47,701 (9%)            | 42,943 (9%)                                         | 4,758 (8%)                                          |
| Registered Midwife (v other health care provider)        | 87,951 (16%)           | 82,120 (17%)                                        | 5,831 (10%)                                         |
| Inadequate prenatal care (APNCU index)                   | 35,524 (6%)            | 32,485 (7%)                                         | 3,039 (5%)                                          |
| Neighbourhood income per person                          |                        |                                                     |                                                     |
| lowest income quintile                                   | 116,961 (21%)          | 103,426 (21%)                                       | 13,535 (24%)                                        |
| mid-low income quintile                                  | 115,957 (21%)          | 102,396 (21%)                                       | 13,561 (24%)                                        |
| middle income quintile                                   | 112,081 (20%)          | 100,630 (20%)                                       | 11,451 (20%)                                        |
| mid-high income quintile                                 | 112,230 (20%)          | 101,960 (21%)                                       | 10,270 (18%)                                        |
| highest income quintile                                  | 86,984 (16%)           | 80,149 (16%)                                        | 6,835 (12%)                                         |
| missing                                                  | 7,244 (1%)             | 6,614 (1%)                                          | 630 (1%)                                            |
| Rural or urban local health area                         |                        |                                                     |                                                     |
| Urban                                                    | 533,929 (97%)          | 478,568 (97%)                                       | 55,361 (98%)                                        |
| Rural                                                    | 17,528 (3%)            | 16,607 (3%)                                         | 921 (2%)                                            |
| Year (July-June)                                         |                        |                                                     |                                                     |
| 2005                                                     | 33,341 (6%)            | 30,940 (6%)                                         | 2,401 (4%)                                          |
| 2006                                                     | 34,284 (6%)            | 31,918 (6%)                                         | 2,366 (4%)                                          |
| 2007                                                     | 35,955 (7%)            | 33,256 (7%)                                         | 2,699 (5%)                                          |
| 2008                                                     | 36,496 (7%)            | 33,704 (7%)                                         | 2,792 (5%)                                          |
| 2009                                                     | 37,703 (7%)            | 34,674 (7%)                                         | 3,029 (5%)                                          |
| 2010                                                     | 38,115 (7%)            | 35,224 (7%)                                         | 2,891 (5%)                                          |
| 2011                                                     | 38,153 (7%)            | 34,653 (7%)                                         | 3,500 (6%)                                          |
| 2012                                                     | 37,158 (7%)            | 33,316 (7%)                                         | 3,842 (7%)                                          |
| 2013                                                     | 37,263 (7%)            | 32,978 (7%)                                         | 4,285 (8%)                                          |
| 2014                                                     | 36,927 (7%)            | 32,917 (7%)                                         | 4,010 (7%)                                          |
| 2015                                                     | 37,089 (7%)            | 32,668 (7%)                                         | 4,421 (8%)                                          |
| 2016                                                     | 37,606 (7%)            | 32,895 (7%)                                         | 4,711 (8%)                                          |
| 2017                                                     | 37,670 (7%)            | 32,639 (7%)                                         | 5,031 (9%)                                          |
| 2018                                                     | 37,280 (7%)            | 32,313 (7%)                                         | 4,967 (9%)                                          |
| 2019                                                     | 36,417 (7%)            | 31,080 (6%)                                         | 5,337 (9%)                                          |
| Gestational diabetes screen completion (v. unscreened)   | 500,619 (91%)          | 445,255 (90%)                                       | 55,364 (98%)                                        |
| Screening method                                         |                        |                                                     |                                                     |

Appendix 1, as submitted by the authors. Appendix to: Nethery E, Law MR, Kotaska A, et al. The effect of changing screening practices and demographics on the incidence of gestational diabetes in British Columbia, 2005–2019. *CMAJ* 2023. doi: 10.1503/cmaj.221404. Copyright © 2023 The Author(s) or their employer(s). To receive this resource in an accessible format, please contact us at [cmajgroup@cmaj.ca](mailto:cmajgroup@cmaj.ca).

The effect of changing screening practices and demographics on the incidence of gestational diabetes in British Columbia, Canada from 2005-2019

| Characteristic                | Overall<br>N = 551,457 | No gestational<br>diabetes diagnosed<br>N = 495,175 | Gestational<br>diabetes<br>diagnosed<br>N = 56, 282 |
|-------------------------------|------------------------|-----------------------------------------------------|-----------------------------------------------------|
| Two-step                      | 368,178 (67%)          | 336,723 (68%)                                       | 31,455 (56%)                                        |
| One-step (IADPSG(6) criteria) | 132,441 (24%)          | 108,532 (22%)                                       | 23,909 (42%)                                        |
| Unscreened                    | 50,838 (9%)            | 49,920 (10%)                                        | 918 (2%)                                            |
| Prior history of GDM          |                        |                                                     |                                                     |
| no                            | 254,034 (46%)          | 229,879 (46%)                                       | 24,155 (43%)                                        |
| no prior pregnancy in data    | 281,459 (51%)          | 258,152 (52%)                                       | 23,307 (41%)                                        |
| yes                           | 15,964 (3%)            | 7,144 (1%)                                          | 8,820 (16%)                                         |

a. Gestational diabetes defined from the gestational diabetes diagnosis variable in the BC-PDR (99.9% of cases)(9) with additional cases identified from the discharge summary of the delivery hospitalization data by ICD-10-CA codes (O24.8 – comparable to O24.4 in ICD-10-CM) (47, <0.1% additional cases)

b. Medical/obstetric complications composite(7) based ICD-10-CA codes in the discharge summary of the delivery hospitalization and the BC-PDR. Codes included pregnancy-complicating pre-existing diseases or conditions (O991, O994, O99803/04/09, O266, O981, O984 to 9, O360, O361), pre-existing hypertension (O100 to 4, O109) and from BC-PDR data: prior neonatal anomaly, stillbirth or neonatal death (direct coded variables)

The effect of changing screening practices and demographics on the incidence of gestational diabetes in British Columbia, Canada from 2005-2019

Supplemental Figure 1. Gestational diabetes risk models stratified by health region

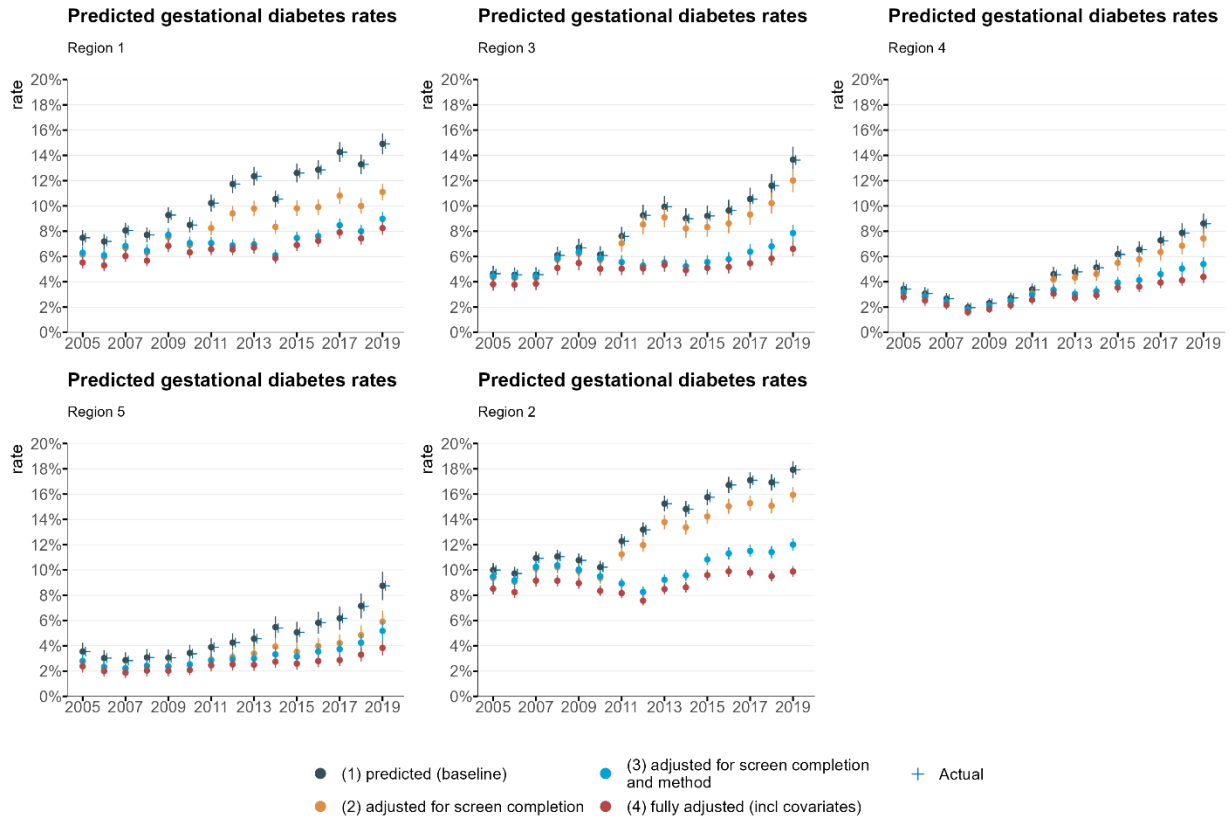

Appendix 1, as submitted by the authors. Appendix to: Nethery E, Law MR, Kotaska A, et al. The effect of changing screening practices and demographics on the incidence of gestational diabetes in British Columbia, 2005–2019. *CMAJ* 2023. doi: 10.1503/cmaj.221404. Copyright © 2023 The Author(s) or their employer(s). To receive this resource in an accessible format, please contact us at cmajgroup@cmaj.ca.

The effect of changing screening practices and demographics on the incidence of gestational diabetes in British Columbia, Canada from 2005-2019

Supplemental Figure 2. Gestational diabetes risk models stratified by pre-pregnancy body mass index

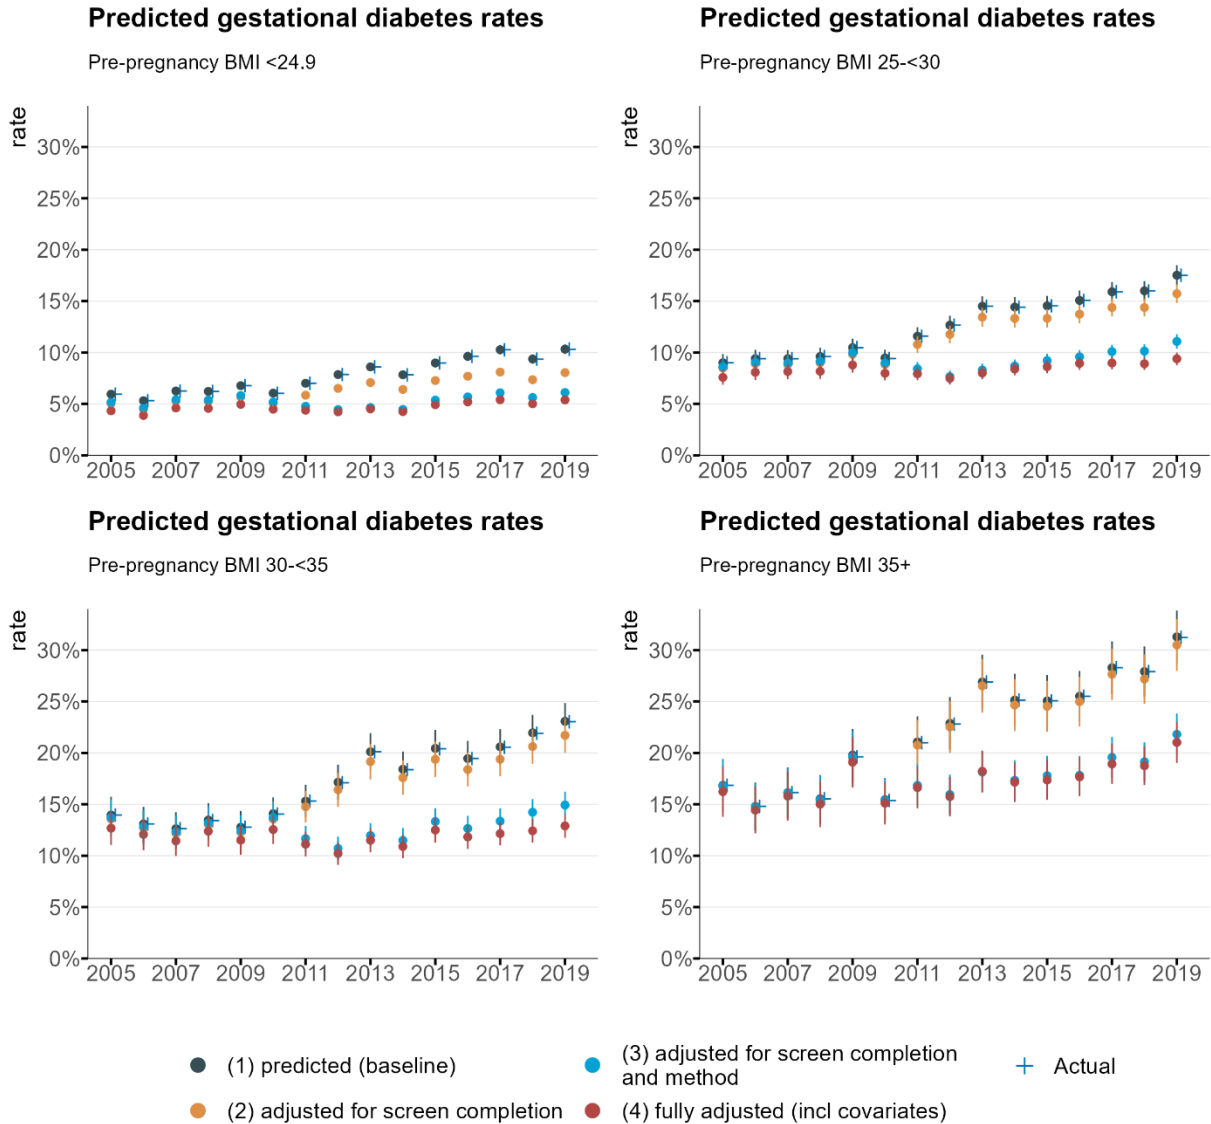

The effect of changing screening practices and demographics on the incidence of gestational diabetes in British Columbia, Canada from 2005-2019

Supplemental Figure 3. Gestational diabetes risk models stratified by age of birthing person at delivery

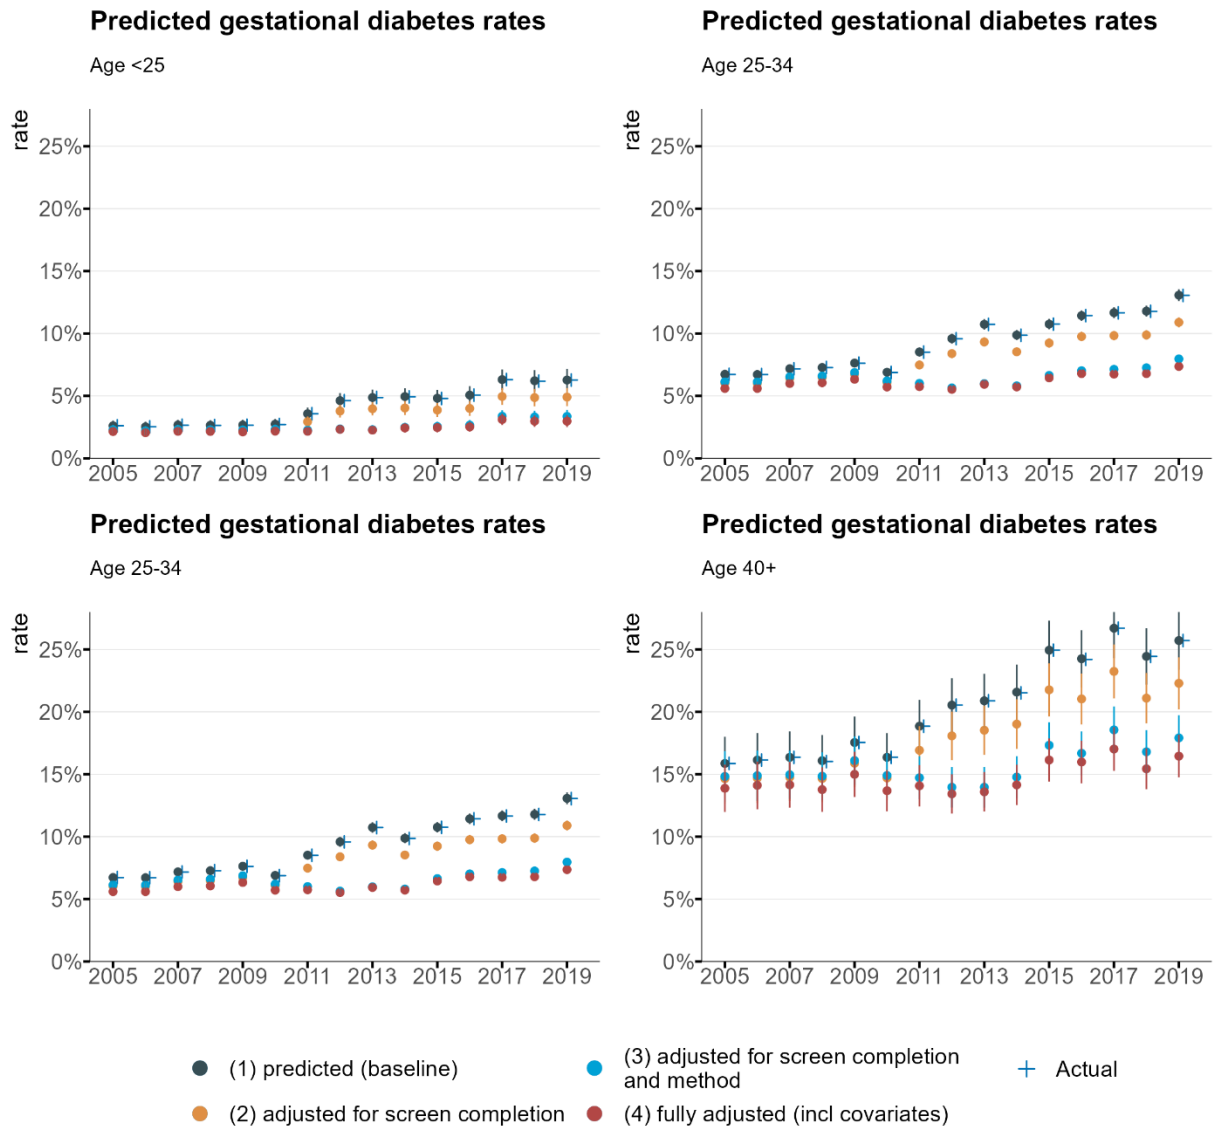

Appendix 1, as submitted by the authors. Appendix to: Nethery E, Law MR, Kotaska A, et al. The effect of changing screening practices and demographics on the incidence of gestational diabetes in British Columbia, 2005–2019. *CMAJ* 2023. doi: 10.1503/cmaj.221404. Copyright © 2023 The Author(s) or their employer(s). To receive this resource in an accessible format, please contact us at cmajgroup@cmaj.ca.



The effect of changing screening practices and demographics on the incidence of gestational diabetes in British Columbia, Canada from 2005-2019

Supplemental Figure 4. Gestational diabetes risk modeled with addition of prior history of gestational diabetes (sensitivity analysis)

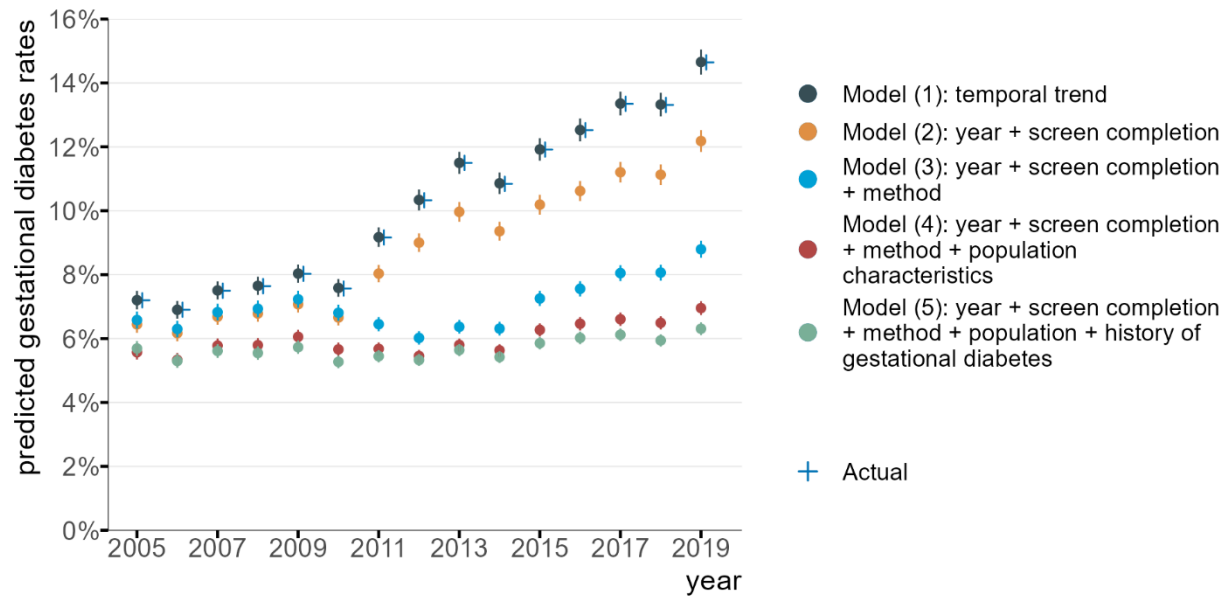

The effect of changing screening practices and demographics on the incidence of gestational diabetes in British Columbia, Canada from 2005-2019

Supplemental Figure 5. Gestational diabetes risk modeled with a variable to adjust for the change in two-step screening from using a 3-hour-100g test with Carpenter-Coustan criteria (prior to October 2010) to using the 2-hour-75g test for two-step screening (Diabetes Canada criteria)

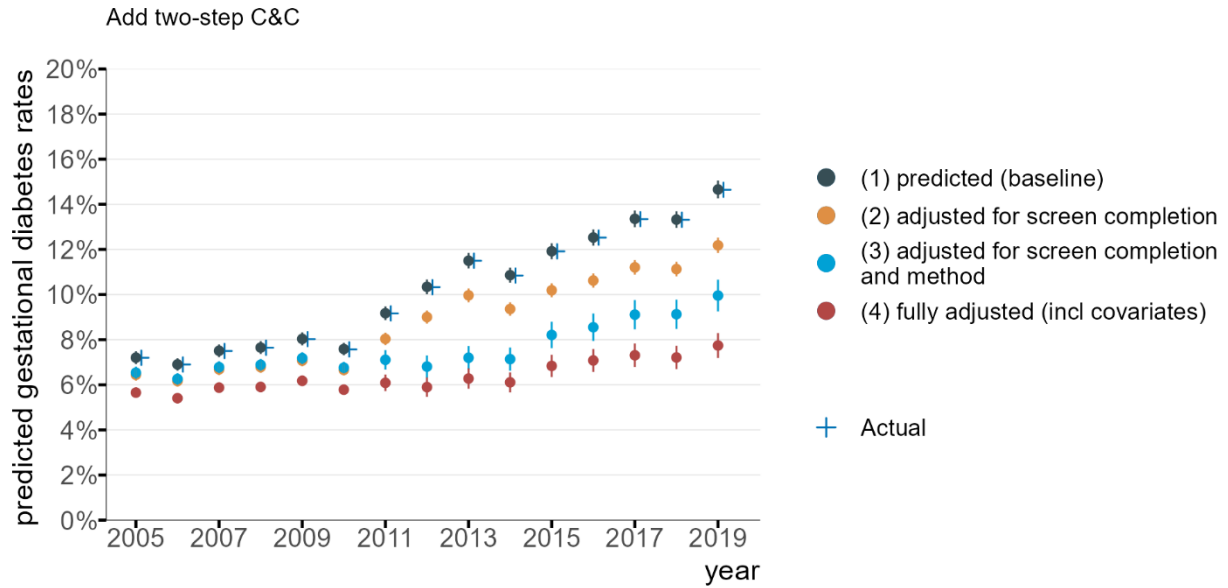

s

# The effect of changing screening practices and demographics on the incidence of gestational diabetes in British Columbia, Canada from 2005-2019

## References

1. Kong JM, Lim K, Thompson DM. Evaluation of the International Association of the Diabetes in Pregnancy Study Group New Criteria : Gestational Diabetes Project. *Can J Diabetes*. 2015;39(2):128–32.
2. Thompson D, Berger H, Feig D, Gagnon R, Kader T, Keely E, et al. Diabetes and Pregnancy. *Can J Diabetes*. 2013;37(SUPPL.1):S168–83.
3. Sterne JAC, White IR, Carlin JB, Spratt M, Royston P, Kenward MG, et al. Multiple imputation for missing data in epidemiological and clinical research: Potential and pitfalls. *BMJ Online*. 2009;339(7713):157–60.
4. Buuren S van, Groothuis-Oudshoorn K. **mice** : Multivariate Imputation by Chained Equations in R. *J Stat Softw* [Internet]. 2011;45(3). Available from: <http://www.jstatsoft.org/v45/i03/>
5. ACOG Committee on Obstetric Practice. ACOG Practice Bulletin No. 190 Summary: Gestational Diabetes Mellitus. *Obstet Gynecol*. 2018;131(2):406–8.
6. International Association of Diabetes and Pregnancy Study Groups Consensus Panel. International Association of Diabetes and Pregnancy Study Groups recommendations on the diagnosis and classification of hyperglycemia in pregnancy. *Diabetes Care*. 2010;33(3):676–82.
7. McRae DN, Janssen PA, Vedam S, Mayhew M, Mpofu D, Teucher U, et al. Reduced prevalence of small-for-gestational-age and preterm birth for women of low socioeconomic position: A population-based cohort study comparing antenatal midwifery and physician models of care. *BMJ Open*. 2018;8(10):1–11.
8. Alexander GR, Kotelchuck M. Quantifying the adequacy of prenatal care: A comparison of indices. *Public Health Rep*. 1996;111(5):408–19.
9. Frosst G, Hutcheon J, Joseph KS, Kinniburgh B, Johnson C, Lee L. Validating the British Columbia Perinatal Data Registry: A chart re-abstraction study. *BMC Pregnancy Childbirth*. 2015;15(1):1–11.
